# Supplementary material
Source: Springer Nature journal article supplement (https://www.springermedizin.de/resource/supplementary/12939_2006_85_MOESM1_ESM.pdf/9551506)
Supplement: MOESM1 [file 9551506]

**Table 1: Degree of satisfaction (% of participants) with last visit to a general practitioner according to country of origin.**

|              | The Oslo Health Study |                       | The Oslo Immigrant Health Study |           |       |          |         |        |
|--------------|-----------------------|-----------------------|---------------------------------|-----------|-------|----------|---------|--------|
|              | Norway                | Non-western countries | Turkey                          | Sri Lanka | Iran  | Pakistan | Vietnam | Total  |
|              | N=9071                | N=758                 | N=185                           | N=312     | N=252 | N=186    | N=222   | N=1157 |
| Very Satisf. | 62.8                  | 40.6                  | 32.4                            | 44.2      | 33.3  | 36.0     | 26.6    | 35,3   |
| Mod. Satisf. | 33.1                  | 48.4                  | 50.8                            | 49.7      | 50.4  | 50.0     | 62.6    | 52,5   |
| Not Satisf.  | 4.1                   | 10.9                  | 16.8                            | 6.1       | 16.3  | 14.0     | 10.8    | 12,2   |
